# Supplementary material for: Polyethylenimine-functionalized mesoporous silica-chitosan composites and their ability to adsorb Pb(ii)
Source: Royal Society of Chemistry journal article supplement (doi:10.1039/d2nj04165k), 2022-01-01
Supplement: d2nj04165k1.pdf [file d2nj04165k1.pdf]

## **Polyethylenimine functionalized mesoporous silica-chitosan composites and their performance on Pb(II) adsorption**

Junshuo Cui, Liangyu Guo, Dandan Wang, Xia Chen, Zhenning Lou, Weijun Shan,  
Ying Xiong\*

*College of Chemistry, Key Laboratory of Rare-scattered Elements of Liaoning  
Province, Liaoning University, Shenyang 110036, P. R. China.*

*\*E-mail: xiongying\_1977@hotmail.com*

## Equations

The adsorption percentage ( $A\%$ ) and adsorption capacity ( $q_e$ ,  $\text{mg g}^{-1}$ ) of Pb(II) on the adsorbents were calculated on the basis of equation (S1) and (S2):

$$A\% = \frac{(C_i - C_e)}{C_i} \times 100\% \quad (\text{S1})$$

$$q_e = \frac{(C_i - C_e) \times V}{W} \quad (\text{S2})$$

Where  $C_i$  and  $C_e$  represent the initial and equilibrium adsorption concentration of metal ions in the solution, respectively.  $V$  (L) is the volume of Pb(II) solution, and  $W$  (mg) is the mass of adsorbent in the solution.

The pseudo-first-order (equation S1), pseudo-second-order (equation S2), Elovich equations (S3) and intraparticle diffusion kinetic model (equation S4) are as follows:

$$\ln(q_e - q_t) = \ln q_e - k_1 t \quad (\text{S3})$$

$$\frac{t}{q_t} = \frac{1}{k_2 q_e^2} + \frac{t}{q_e} \quad (\text{S4})$$

$$q_t = \frac{1}{b} \ln(ab) + \frac{1}{b} \ln t \quad (\text{S5})$$

$$q_t = k_p t^{0.5} + C \quad (\text{S6})$$

where  $q_e$  ( $\text{mg g}^{-1}$ ) and  $q_t$  ( $\text{mg g}^{-1}$ ) are the adsorption amount at equilibrium time and a certain time  $t$  (h), respectively.  $k_1$  ( $\text{h}^{-1}$ ),  $k_2$  ( $\text{g mg}^{-1} \text{h}^{-1}$ ) and  $k_p$  ( $\text{mg g}^{-1} \text{h}^{0.5}$ ) are the rate constant of the homologous kinetics equations, respectively. And  $a$  ( $\text{mg g}^{-1} \text{h}^{-1}$ ) represents Elovich constant and  $b$  ( $\text{g mg}^{-1}$ ) represents a coefficient associated with the activation energy of the adsorption.  $C$  is a constant related to the boundary layer thickness.

The Gibbs free energy change ( $\Delta G^0$ ), enthalpy change ( $\Delta H^0$ ), and entropy change ( $\Delta S^0$ ) of the adsorption process were calculated by the following equations (S7-S10):

$$K_d = \frac{C_a}{C_e} \quad (\text{S7})$$

$$\Delta G^0 = -RT \ln K_d \quad (\text{S8})$$

$$\ln K_d = \frac{\Delta S^0}{R} - \frac{\Delta H^0}{RT} \quad (\text{S9})$$

$$\Delta G^0 = \Delta H^0 - T\Delta S^0 \quad (\text{S10})$$

Where  $C_a$  ( $\text{mg}\cdot\text{L}^{-1}$ ) is the adsorbed concentration at equilibrium,  $C_e$  ( $\text{mg}\cdot\text{L}^{-1}$ ) is the equilibrium concentration of the solution,  $K_d$  is the equilibrium constant,  $R$  ( $8.314 \text{ J}\cdot\text{mol}^{-1}\cdot\text{K}^{-1}$ ) is the universal gas constant and  $T$  (K) is the absolute temperature.

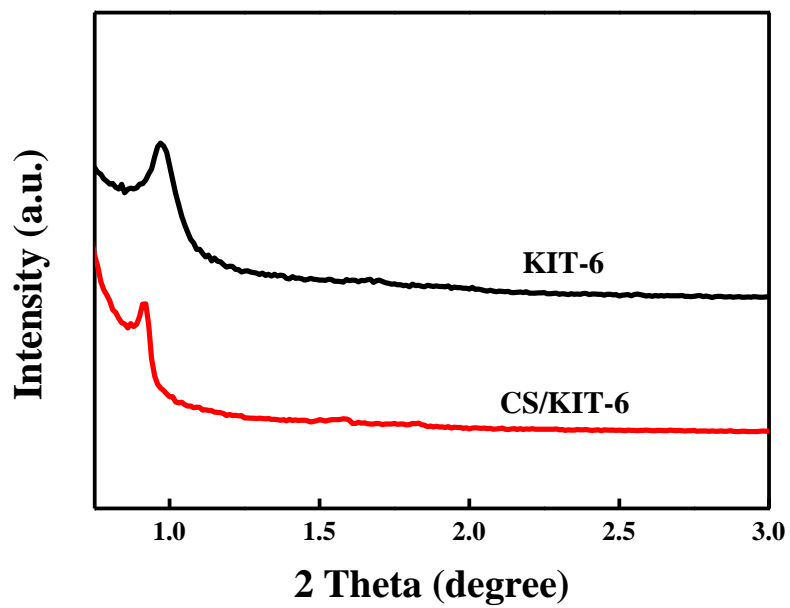

**Fig. S1** Small angle XRD patterns of the synthesized KIT-6 type composites.

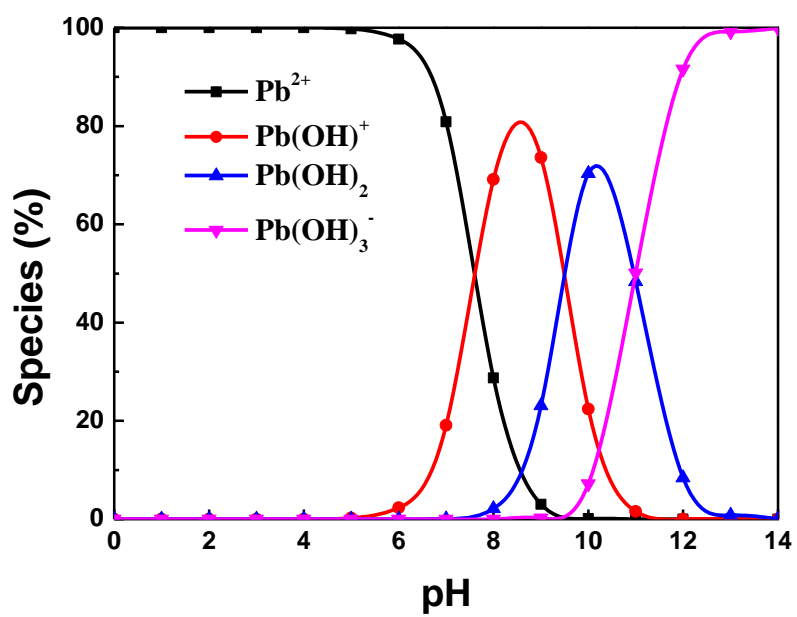

**Fig. S2** The speciation diagram of Pb at varies pH values.

**Table S1** Adsorption kinetic parameters of different temperatures for Pb(II) adsorption on CK-T<sub>50</sub>/t<sub>20</sub>-m<sub>0.2</sub>.

| Temperature<br>(K) | $q_e$<br>(mg·g <sup>-1</sup> ) | pseudo first-order equation    |                                               |       | pseudo second-order equation   |                                               |       | Elovich equation                                   |                                  |       | Intraparticle diffusion                          |       |
|--------------------|--------------------------------|--------------------------------|-----------------------------------------------|-------|--------------------------------|-----------------------------------------------|-------|----------------------------------------------------|----------------------------------|-------|--------------------------------------------------|-------|
|                    |                                | $q_e$<br>(mg·g <sup>-1</sup> ) | $k$<br>(g·mg <sup>-1</sup> ·h <sup>-1</sup> ) | $R^2$ | $q_e$<br>(mg·g <sup>-1</sup> ) | $k$<br>(g·mg <sup>-1</sup> ·h <sup>-1</sup> ) | $R^2$ | $\alpha$<br>(mg·g <sup>-1</sup> ·h <sup>-1</sup> ) | $\beta$<br>(g·mg <sup>-1</sup> ) | $R^2$ | $k_p$<br>(mg·g <sup>-1</sup> ·h <sup>1/2</sup> ) | $R^2$ |
| 303                | 18.43                          | 14.78                          | -0.19                                         | 0.97  | 19.36                          | 0.59                                          | 0.99  | 43.5124                                            | 0.33                             | 0.94  | 3.74                                             | 0.91  |
| 313                | 18.87                          | 14.29                          | -0.18                                         | 0.97  | 20.00                          | 0.68                                          | 0.99  | 55.4857                                            | 0.33                             | 0.94  | 3.67                                             | 0.90  |
| 323                | 21.21                          | 15.14                          | -0.25                                         | 0.97  | 20.41                          | 0.89                                          | 1.00  | 13.8459                                            | 0.32                             | 0.88  | 3.65                                             | 0.88  |

**Table S2** Adsorption isotherm parameters for Pb(II) adsorption onto the prepared adsorbents at 303 K, pH 6.

| Adsorbent                                             | Langmuir               |                        |        | Freundlich             |        |        | Temkin                           |          |        |
|-------------------------------------------------------|------------------------|------------------------|--------|------------------------|--------|--------|----------------------------------|----------|--------|
|                                                       | $q_{\max}$             | $K_L$                  | $R^2$  | $K_F$                  | $n$    | $R^2$  | $A$                              | $b$      | $R^2$  |
|                                                       | ( $\text{mg g}^{-1}$ ) | ( $\text{mg L}^{-1}$ ) |        | ( $\text{L mg}^{-1}$ ) |        |        | ( $\text{L}\cdot\text{g}^{-1}$ ) |          |        |
| CK-T <sub>50</sub> /t <sub>5</sub> -m <sub>0.2</sub>  | 211.89                 | 0.0144                 | 0.9689 | 16.7171                | 2.6666 | 0.9380 | 0.3943                           | 83.6101  | 0.9380 |
| CK-T <sub>50</sub> /t <sub>10</sub> -m <sub>0.2</sub> | 159.57                 | 0.0076                 | 0.9813 | 17.1101                | 2.6949 | 0.8958 | 0.2363                           | 74.2388  | 0.9621 |
| CK-T <sub>50</sub> /t <sub>20</sub> -m <sub>0.2</sub> | 279.08                 | 0.0251                 | 0.9938 | 22.6417                | 2.6621 | 0.9671 | 0.3352                           | 59.6432  | 0.9646 |
| CK-T <sub>70</sub> /t <sub>20</sub> -m <sub>0.2</sub> | 219.60                 | 0.0145                 | 0.9718 | 12.8447                | 2.4281 | 0.9536 | 0.4462                           | 92.6737  | 0.8725 |
| CK-T <sub>50</sub> /t <sub>20</sub> -m <sub>0.1</sub> | 146.72                 | 0.0115                 | 0.9856 | 6.6441                 | 2.2094 | 0.9626 | 0.1161                           | 99.3063  | 0.9708 |
| CK-T <sub>50</sub> /t <sub>20</sub> -m <sub>0.3</sub> | 149.70                 | 0.0091                 | 0.9888 | 19.6447                | 3.0155 | 0.9195 | 0.7251                           | 104.5448 | 0.9190 |
| CK-T <sub>50</sub> /t <sub>20</sub> -m <sub>0.4</sub> | 160.10                 | 0.0102                 | 0.9959 | 30.4245                | 3.6095 | 0.8596 | 0.8188                           | 92.3555  | 0.9385 |
